# Supplementary material for: The Contribution of Ebola Viral Load at Admission and Other Patient Characteristics to Mortality in a Médecins Sans Frontières Ebola Case Management Centre, Kailahun, Sierra Leone, June–October 2014
Source: PubMed Central journal article supplement — J Infect Dis. 2015 May 22;212(11):1752–8. doi: 10.1093/infdis/jiv304 (PMC4633764; doi:10.1093/infdis/jiv304), 2015-05-22
Supplement: supp_jiv304_jiv304supp_fig3.pdf [file supp_jiv304_jiv304supp_fig3.pdf]

# Kailahun - Distances between cases and Kailahun CMC - (As the crow flies)

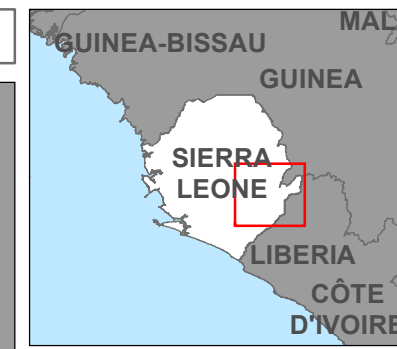

| localities          | confirmed cases | distance from Kailahun CMC (km) |
|---------------------|-----------------|---------------------------------|
| Baima               | 1               | 26,7817                         |
| Belebu              | 1               | 2,6231                          |
| Bo                  | 2               | 122,6414                        |
| Bombohun            | 2               | 43,5254                         |
| Buedu A             | 7               | 18,6665                         |
| Bumpe               | 1               | 57,9889                         |
| Bunumbu I           | 7               | 33,0923                         |
| Dablama             | 1               | 33,9161                         |
| Daru                | 33              | 42,0399                         |
| Fenesu              | 2               | 18,4355                         |
| Fothaneh            | 2               | 114,6752                        |
| Freetown            | 4               | 271,695                         |
| Garama              | 2               | 28,5347                         |
| Gbanyawalu          | 5               | 11,8441                         |
| Gbeka               | 1               | 37,4056                         |
| Gbolebu             | 1               | 25,2223                         |
| Gbondu              | 1               | 65,6489                         |
| Gohn                | 2               | 37,6312                         |
| Gohun               | 1               | 37,5917                         |
| Goma                | 3               | 47,5956                         |
| Gouma               | 1               | 47,6957                         |
| Grima               | 2               | 36,3544                         |
| Jeneh               | 1               | 75,4627                         |
| Jojoima             | 3               | 47,9769                         |
| Jokibu              | 1               | 30,4258                         |
| Kailahun            | 15              | 2,6919                          |
| Kalia               | 8               | 111,9053                        |
| Kamator             | 2               | 101,2299                        |
| Karassa             | 1               | 165,5651                        |
| Kenema              | 2               | 75,2223                         |
| Koidu               | 3               | 53,881                          |
| Koindu A            | 23              | 27,3639                         |
| Komrabai            | 3               | 198,8464                        |
| Kondoma             | 1               | 15,0787                         |
| Kongoma A           | 3               | 12,5696                         |
| Konia               | 1               | 17,7473                         |
| Korma               | 7               | 28,6583                         |
| Kortuma             | 2               | 46,4569                         |
| Koyama              | 2               | 11,5996                         |
| Kpangbani           | 1               | 26,4513                         |
| Kpemalu             | 2               | 0,4963                          |
| Kpengbedu           | 1               | 25,482                          |
| Kpondu              | 2               | 30,4759                         |
| Kusedu              | 11              | 30,0076                         |
| Levuma              | 4               | 28,1536                         |
| Lumley              | 1               | 271,8892                        |
| Mabamp              | 2               | 246,6921                        |
| Magbafth            | 4               | 105,9972                        |
| Magbakre            | 10              | 145,2451                        |
| Magbeti             | 1               | 131,5902                        |
| Magbitinoh          | 3               | 210,1844                        |
| Magburaka (I)       | 4               | 145,4787                        |
| Makeni              | 80              | 160,3212                        |
| Malema              | 2               | 41,7194                         |
| Manewa              | 3               | 163,4549                        |
| Manowa              | 1               | 22,844                          |
| Masamu              | 4               | 199,4673                        |
| Masireku            | 1               | 171,1565                        |
| Masoko              | 2               | 143,5425                        |
| Massao              | 1               | 34,4047                         |
| Masuba              | 2               | 153,547                         |
| Mayati              | 1               | 209,1066                        |
| Mayobo              | 2               | 162,9215                        |
| Moyamba (B)         | 6               | 188,3558                        |
| Moyamba Junction    | 1               | 165,8456                        |
| Nagbena             | 1               | 38,9198                         |
| Naiagorehur         | 2               | 20,9508                         |
| Ngegor              | 4               | 8,5626                          |
| Ngeima              | 11              | 7,5508                          |
| Ngolahun            | 22              | 32,3675                         |
| Niahun Gbuyama      | 9               | 44,8147                         |
| Njala               | 4               | 41,797                          |
| Nyandehun           | 5               | 48,9062                         |
| Nyandehun           | 1               | 22,9916                         |
| Palawo              | 1               | 27,5006                         |
| Pendembu            | 40              | 24,1727                         |
| Petbana             | 26              | 156,9308                        |
| Pobengue            | 5               | 18,6815                         |
| Pujehun             | 13              | 28,3866                         |
| Rogbon              | 4               | 208,525                         |
| Segbwema            | 22              | 49,3206                         |
| Sembehun            | 1               | 22,734                          |
| Sondokoro Lolobengu | 3               | 23,6902                         |
| Soniyiema I         | 2               | 60,4489                         |
| Soso Town           | 1               | 39,3206                         |
| Tomboma             | 2               | 48,0775                         |
| Turadu              | 3               | 31,1888                         |
| Vaahun (A)          | 2               | 52,118                          |
| Waterloo            | 2               | 250,9674                        |
| Weima               | 5               | 28,3826                         |
| Yaladu              | 2               | 27,6567                         |
| unknown             | 20              |                                 |
| <b>total cases</b>  | <b>525</b>      |                                 |

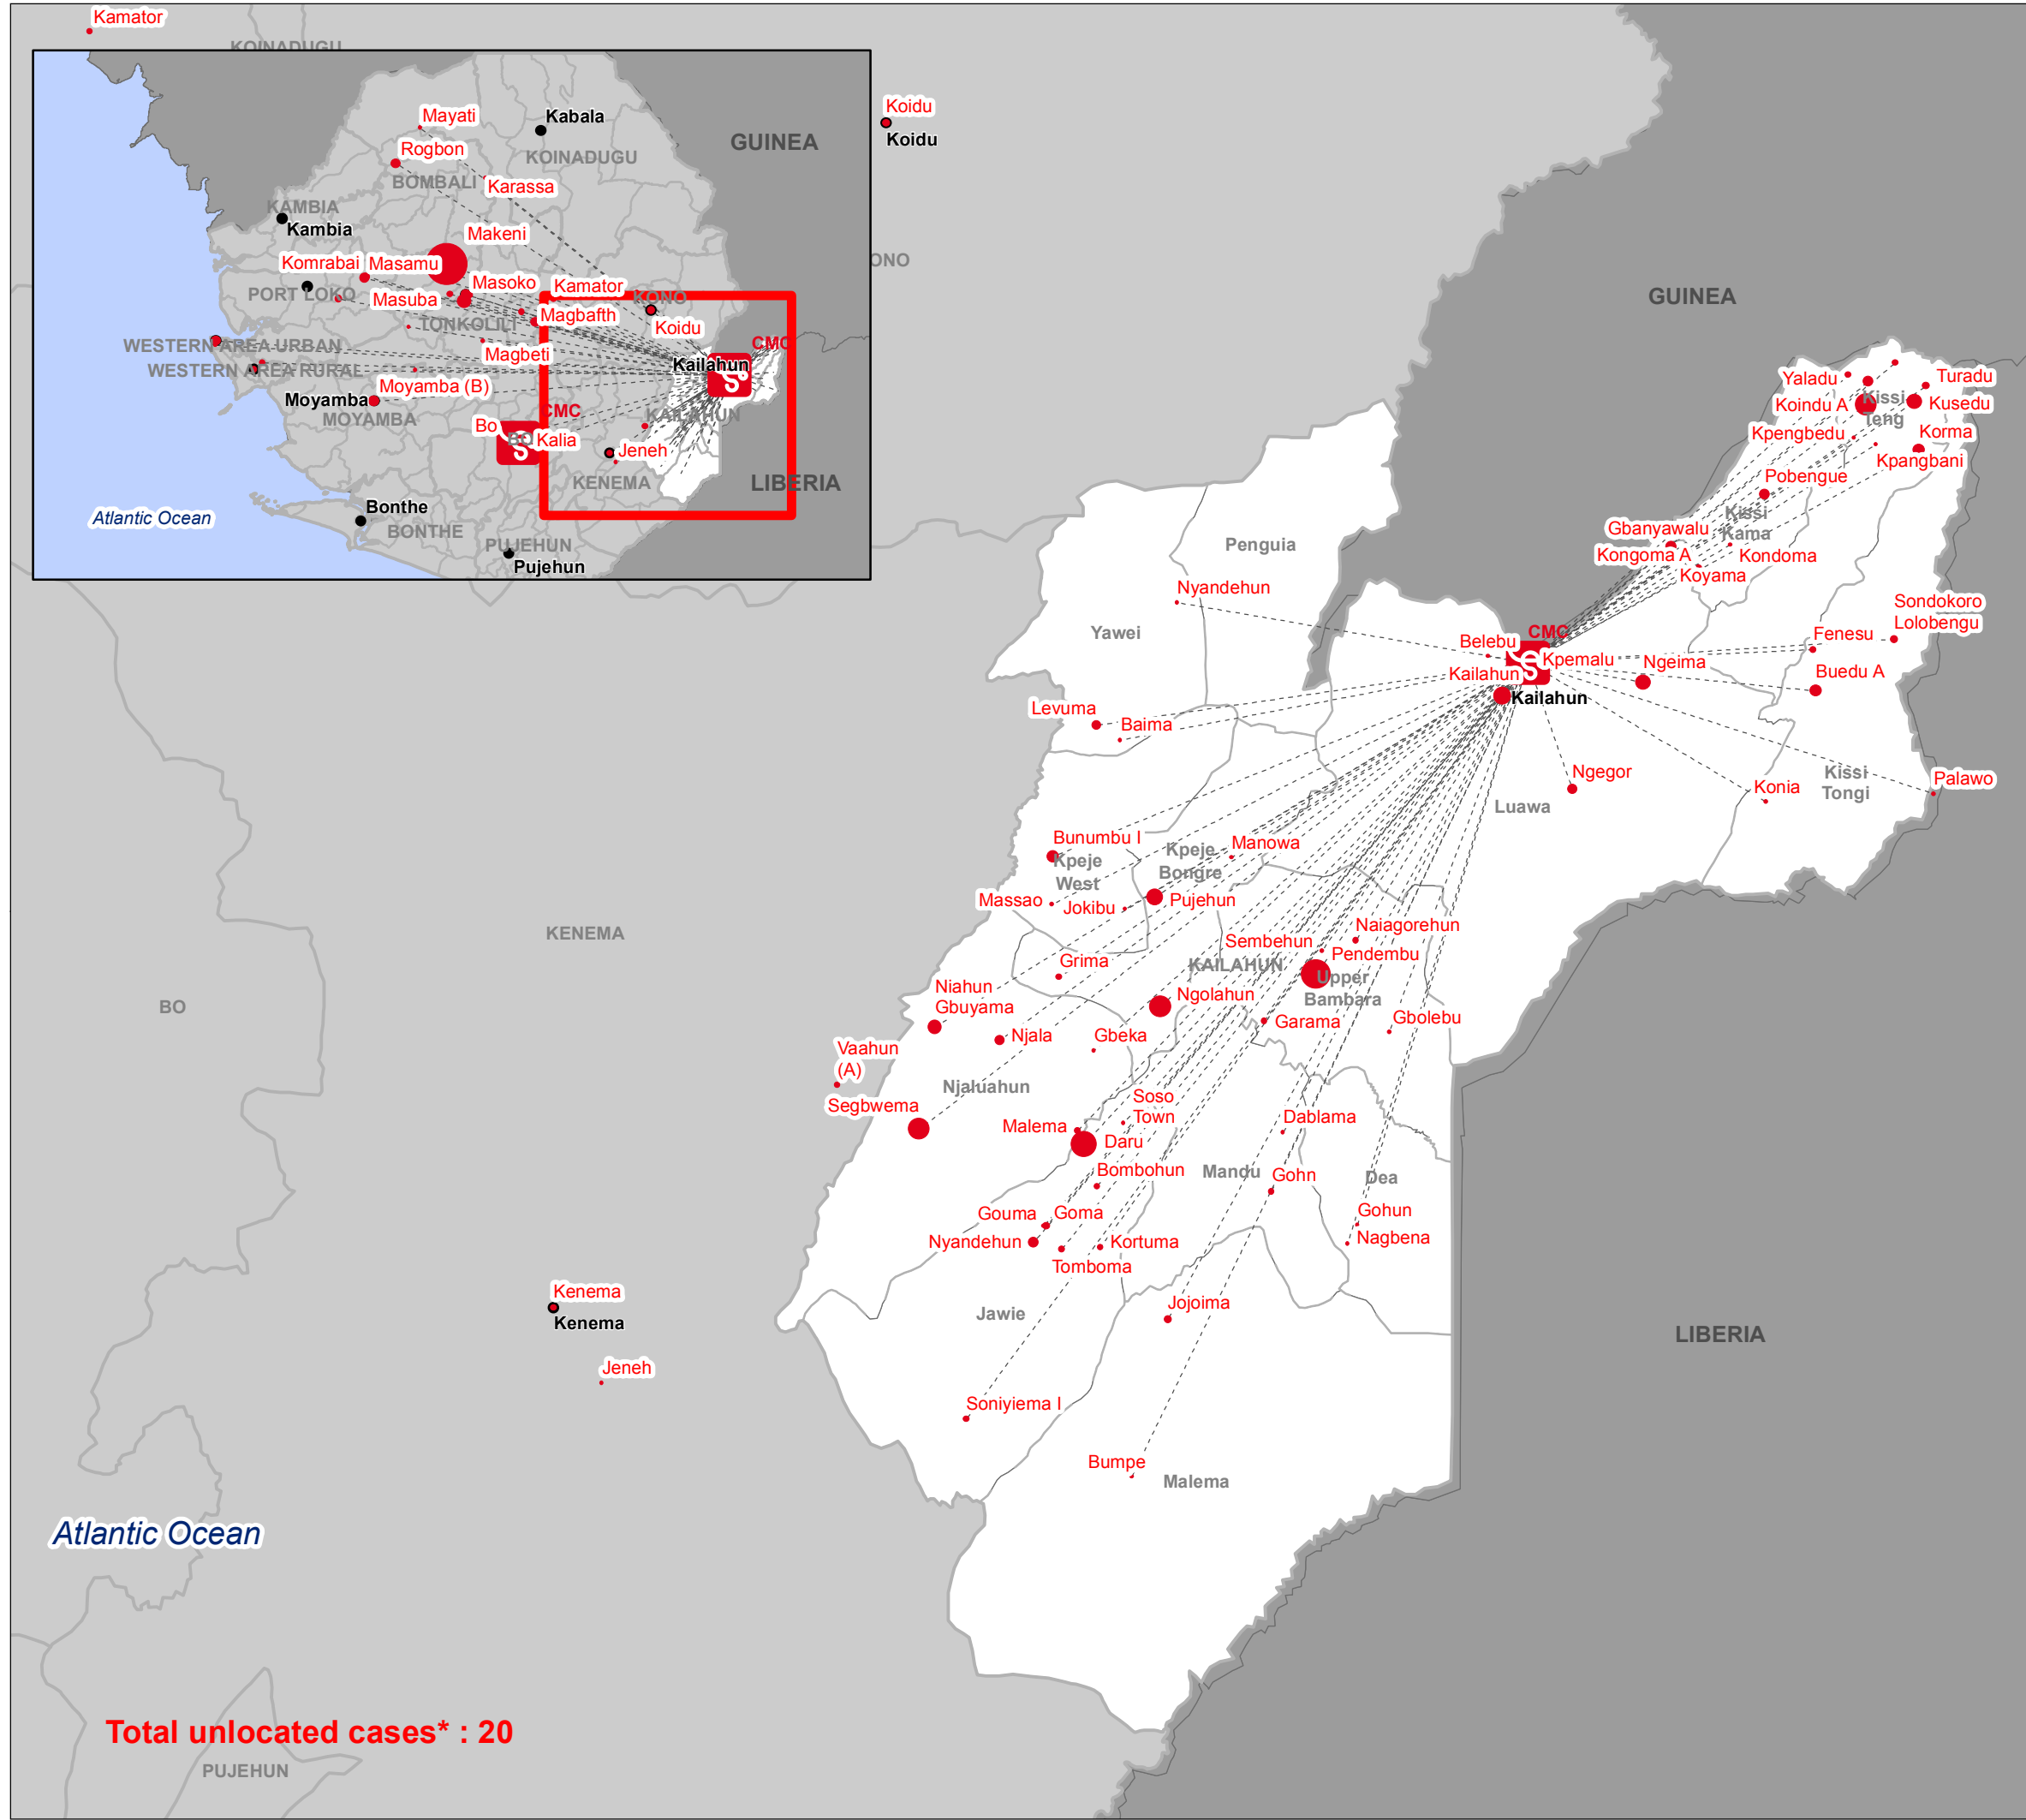

**Legend**

**type**

- MSF case management center (CMC)

**confirmed cases**

- 1
- 5
- 10
- 50
- 100

- district capital
- case - CMC line distance
- countries
- chiefdoms
- other districts
- Kailahun district

Bo CMC opened in october 2014  
 \* Unlocated cases : No information about the place of origin of the cases

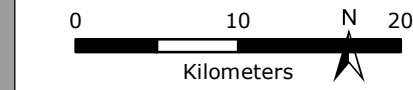

**Sources:**  
 Cases, district capital : MSF  
 Admin borders : Statistic SL  
 Data confirmed cases between 27th june 2014 to 12th of october 2014

**Map Information**  
 Document name: SLE\_KAI\_CASES\_CMC\_DISTANCE\_ZOOM  
 Date: 24/11/2014  
 Datum : WGS84 - EPSG 4326  
 Made by MSF-CH Field GIS Officer  
 GisUnit.GVA@geneva.msf.org  
 Print: ISO A3

Mapping material provided for information purposes and do not imply official recognition by MSF.  
 Spatial information is displayed as known at edition date and under all reserves.

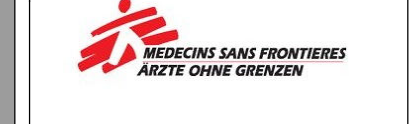

**Total unlocated cases\* : 20**
